# Supplementary material for: Bob1 maintains T follicular helper cells for long-term humoral immunity
Source: PubMed Central journal article supplement (PMC10869348; doi:10.1038/s42003-024-05827-0), 2024-02-15
Supplement: 42003_2024_5827_MOESM2_ESM.pdf [file 42003_2024_5827_MOESM2_ESM.pdf]

## **Description of Additional Supplementary Files**

**File name:** Supplementary Data

**Description:** Numerical source data for the graphs in the main and supplementary figures.
